# Supplementary material for: Targeting MDM2 for Neuroblastoma Therapy: In Vitro and In Vivo Anticancer Activity and Mechanism of Action
Source: PubMed Central journal article supplement (PMC7762001; doi:10.3390/cancers12123651), 2020-12-05
Supplement: cancers-12-03651-s001.pdf [file cancers-12-03651-s001.pdf]

# Supplementary Materials: Targeting MDM2 for Neuroblastoma Therapy: In Vitro and In Vivo Anticancer Activity and Mechanism of Action

Wei Wang, Xinjie Wang, Mehrdad Rajaei, Ji Youn Youn, Atif Zafar, Hemantkumar Deokar, John K. Buolamwini, Jianhua Yang, Jennifer H. Foster, Jia Zhou and Ruiwen Zhang

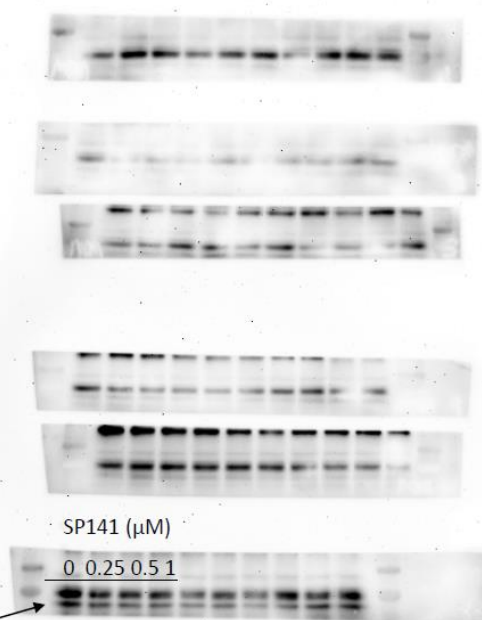

Fig1C: MDM2 in NB1643 cells

Fig1C: MDMX in NB1643 cells

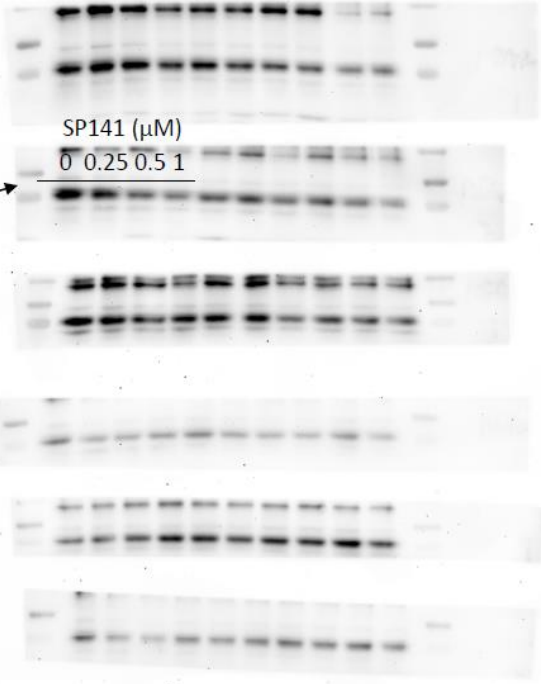

Fig1C: p53 in NB1643 cells

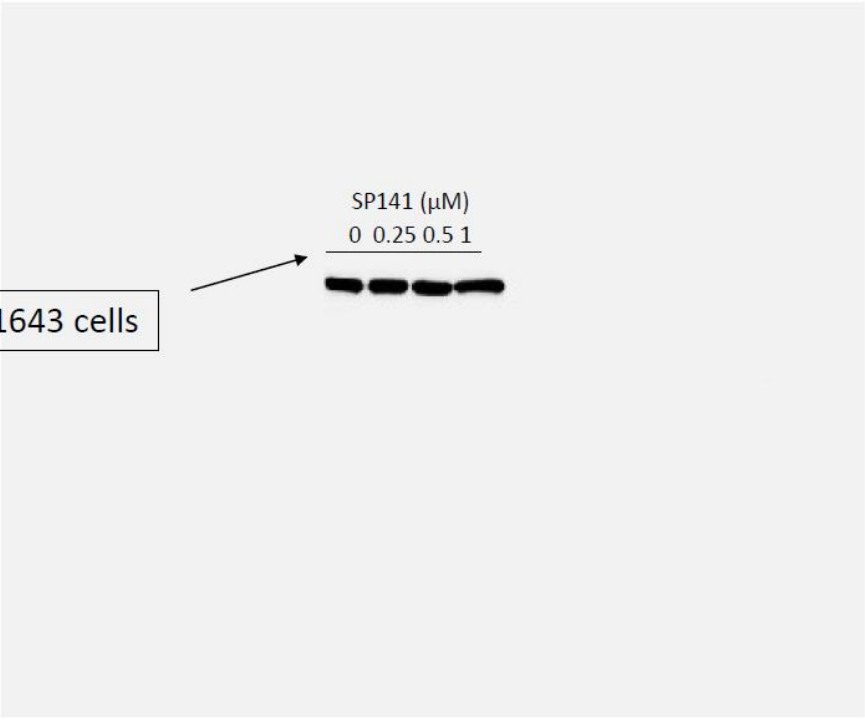

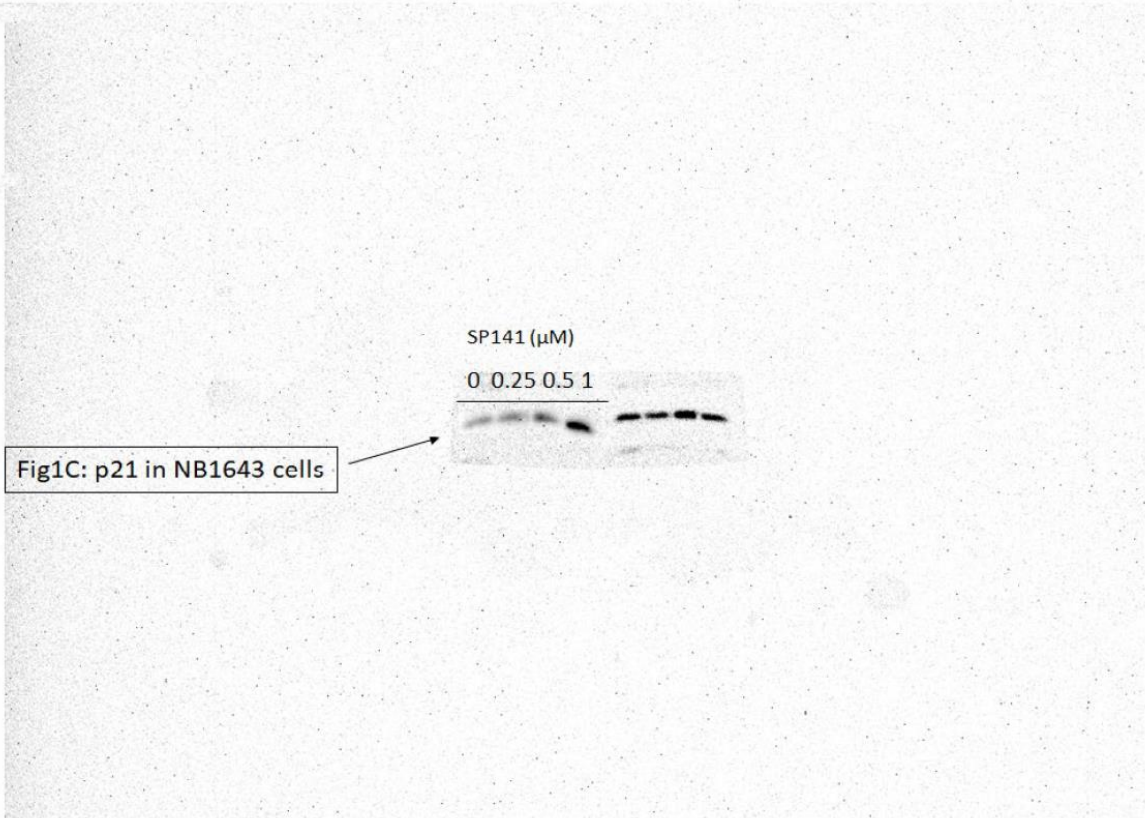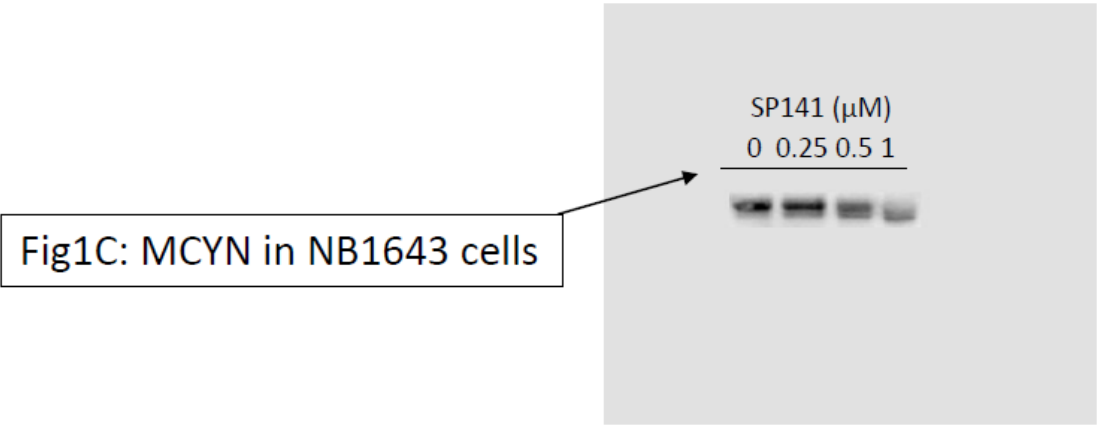

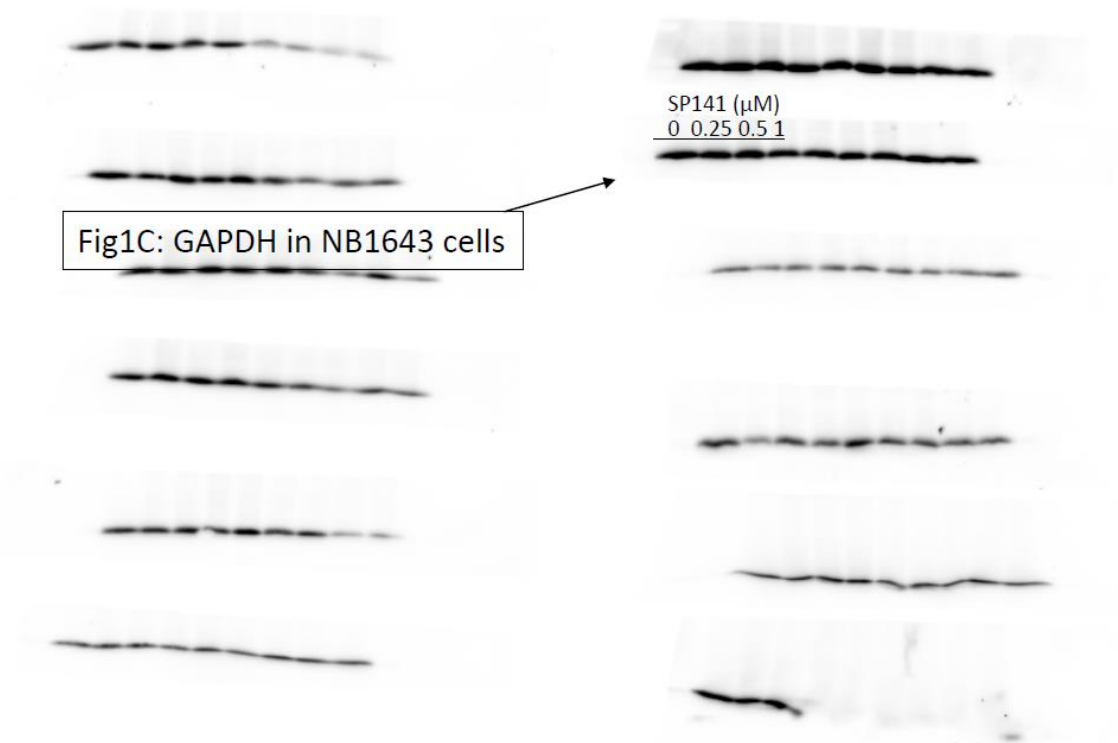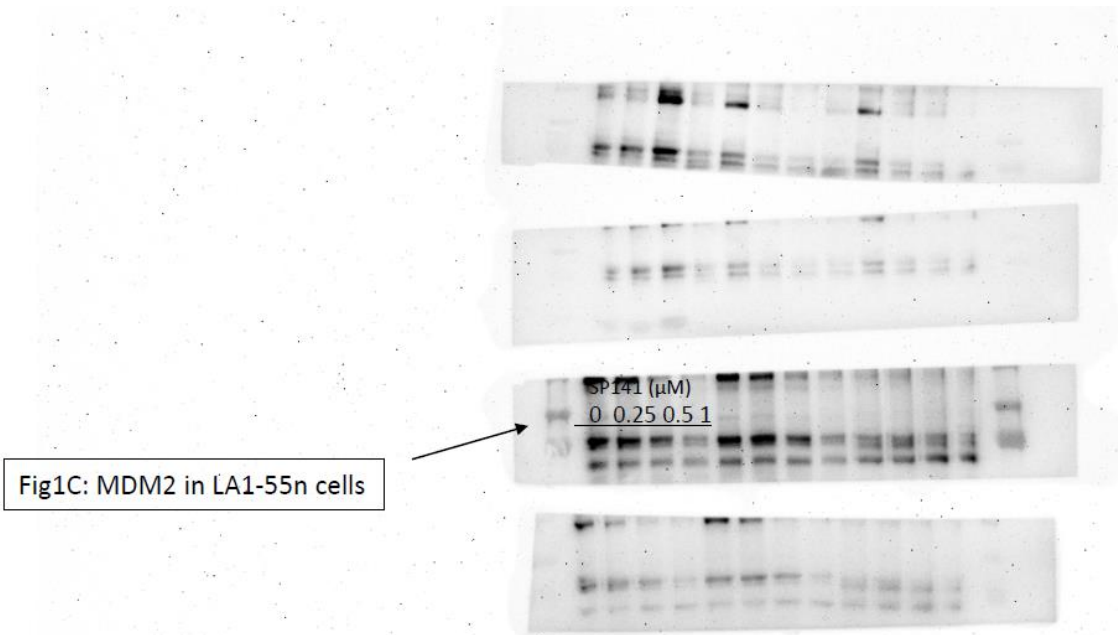

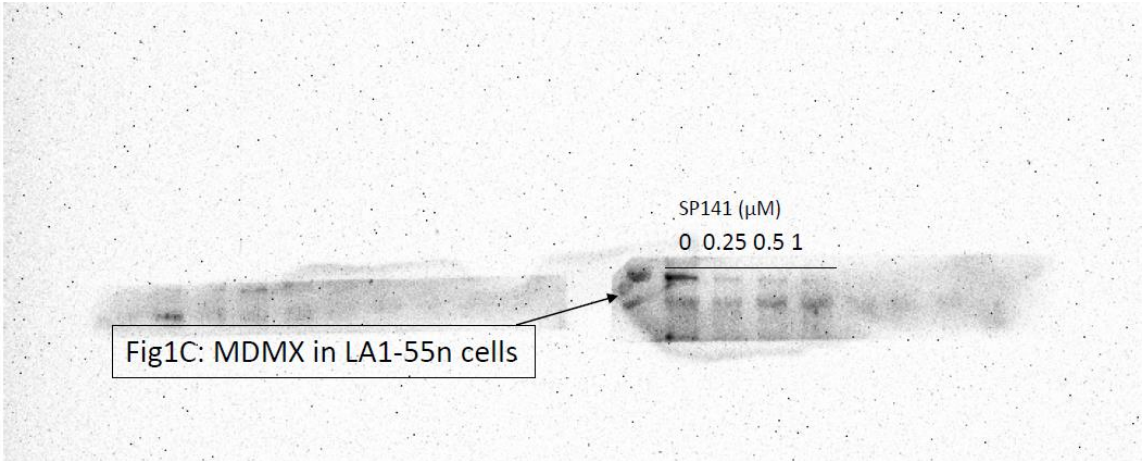

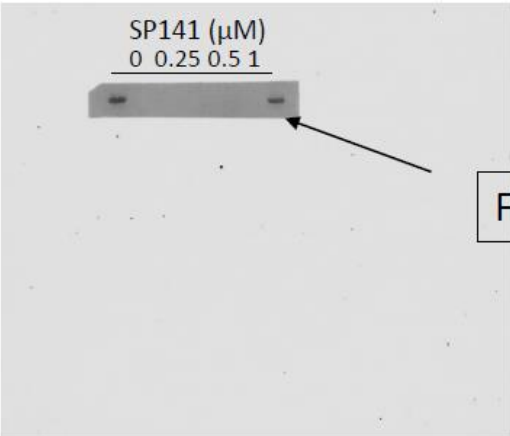

Fig1C: p53 in LA1-55n cells

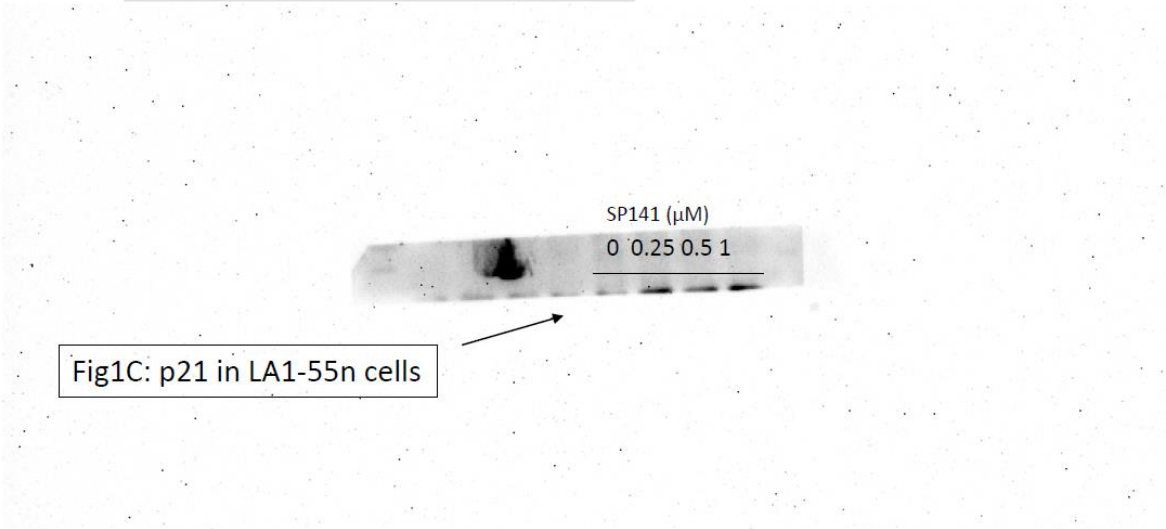

Fig1C: p21 in LA1-55n cells

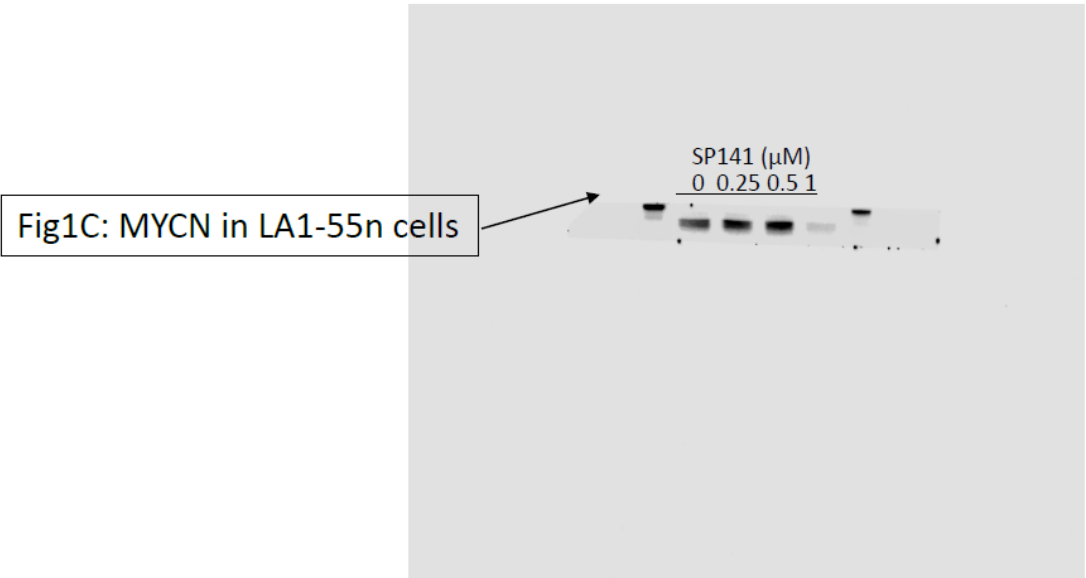

Fig1C: MYCN in LA1-55n cells

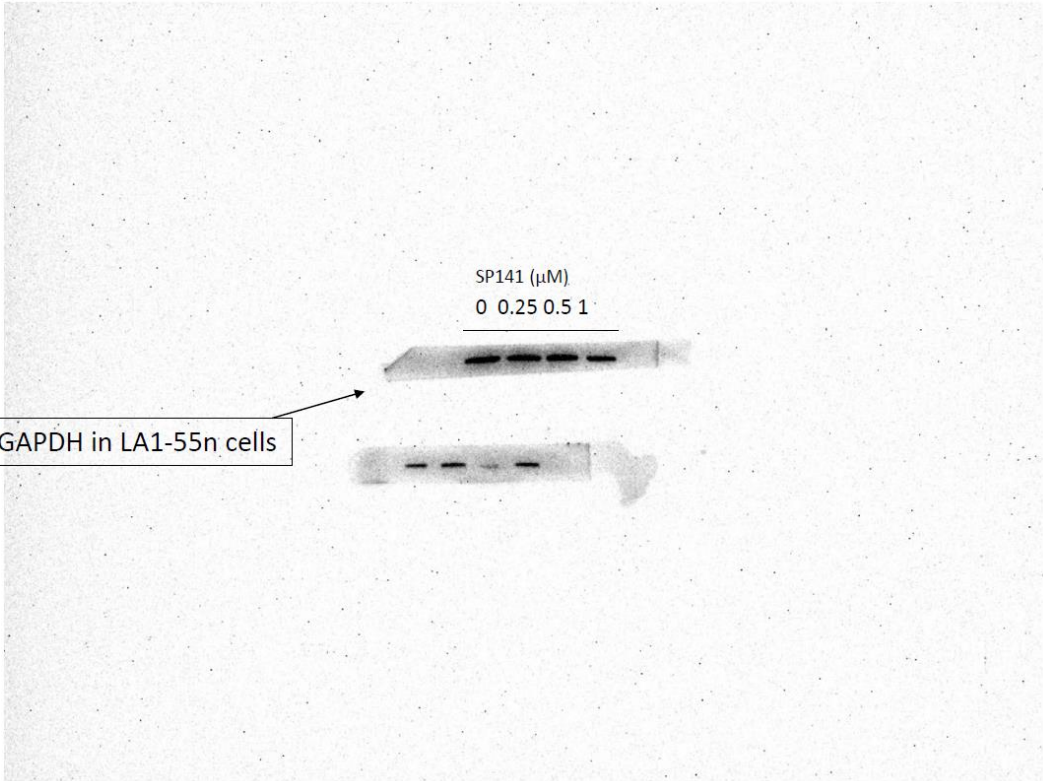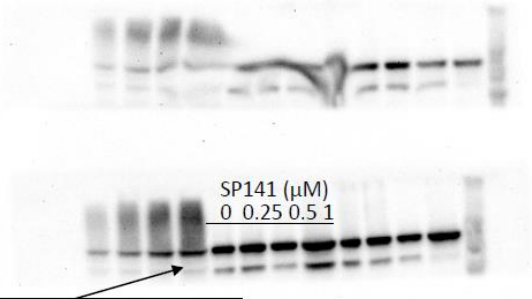

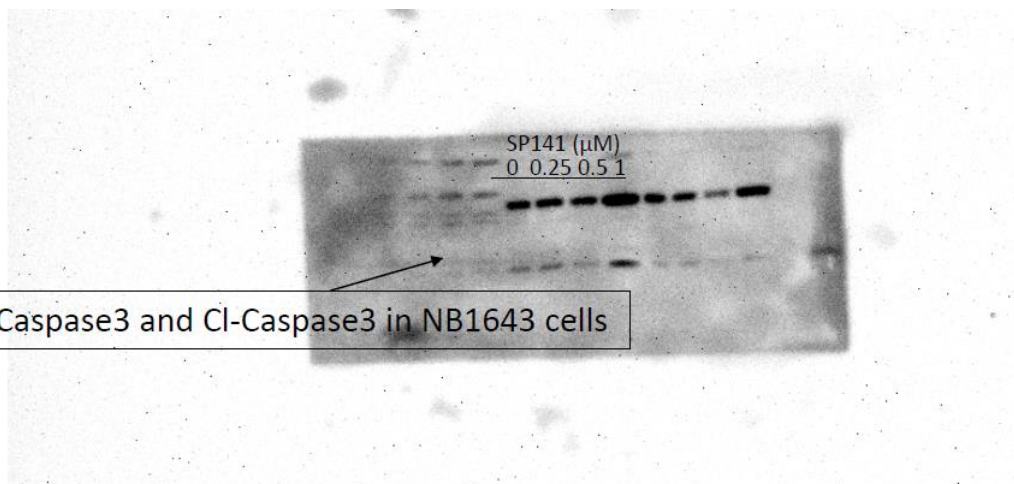



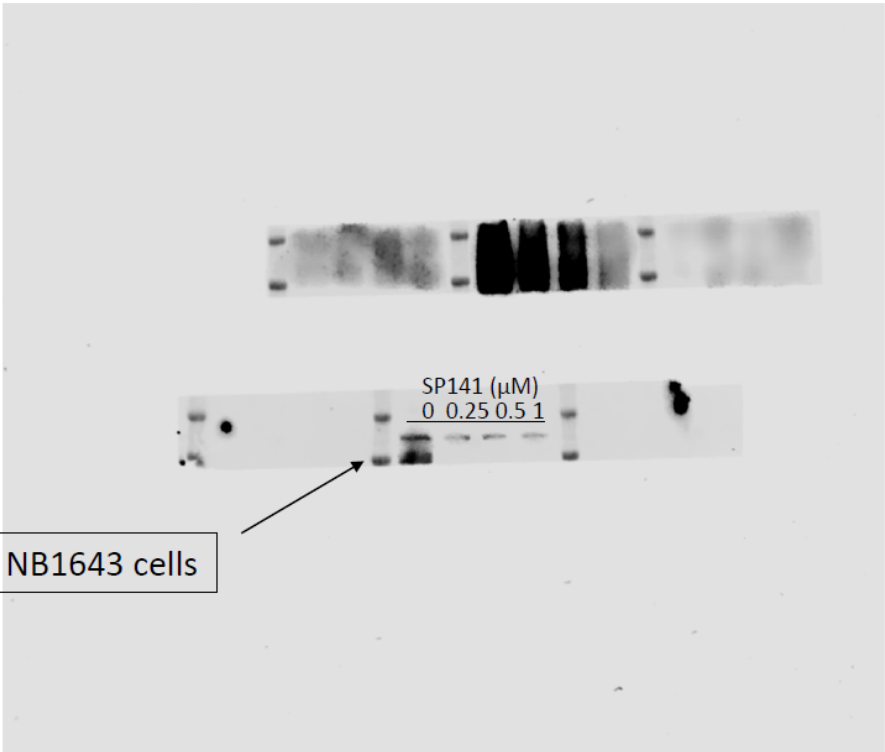

Fig2C: Ki67 in NB1643 cells

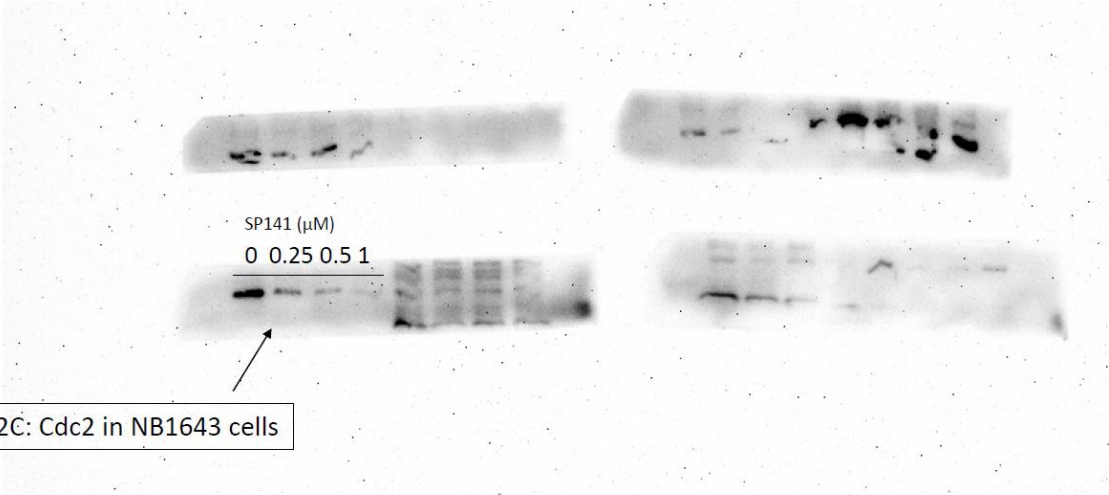

Fig2C: Cdc2 in NB1643 cells

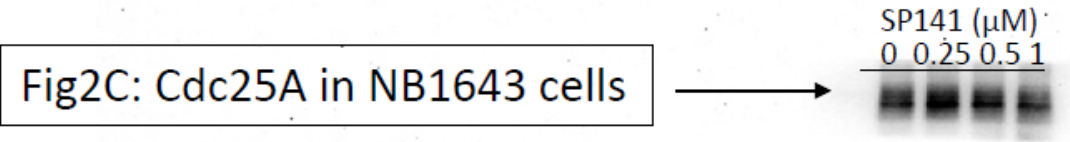

Fig2C: Cdc25A in NB1643 cells

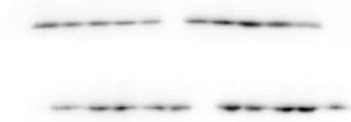

Fig2C: GAPDH in NB1643 cells

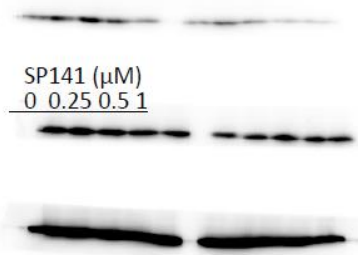

Fig2C: PARP and Cl-PARP in LA1-55n cells

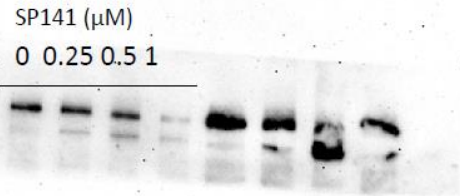

Fig2C: Caspase3 and Cl-Caspase3 in LA1-55n cells

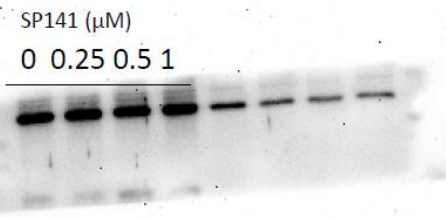

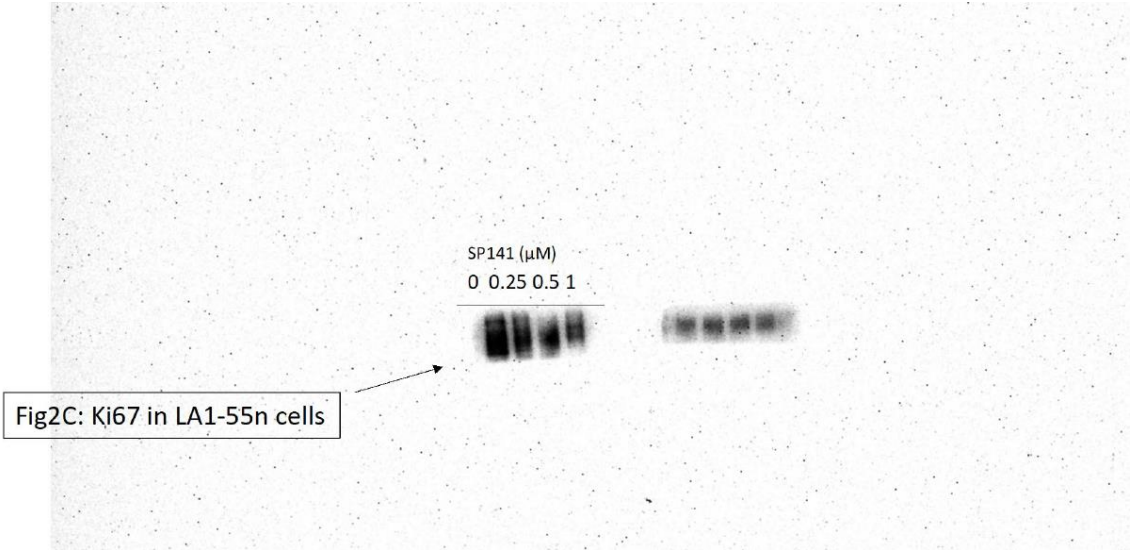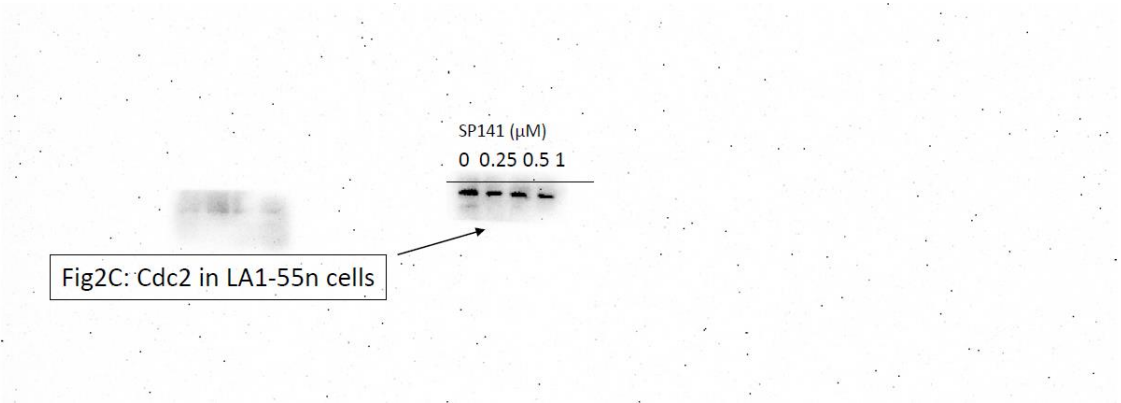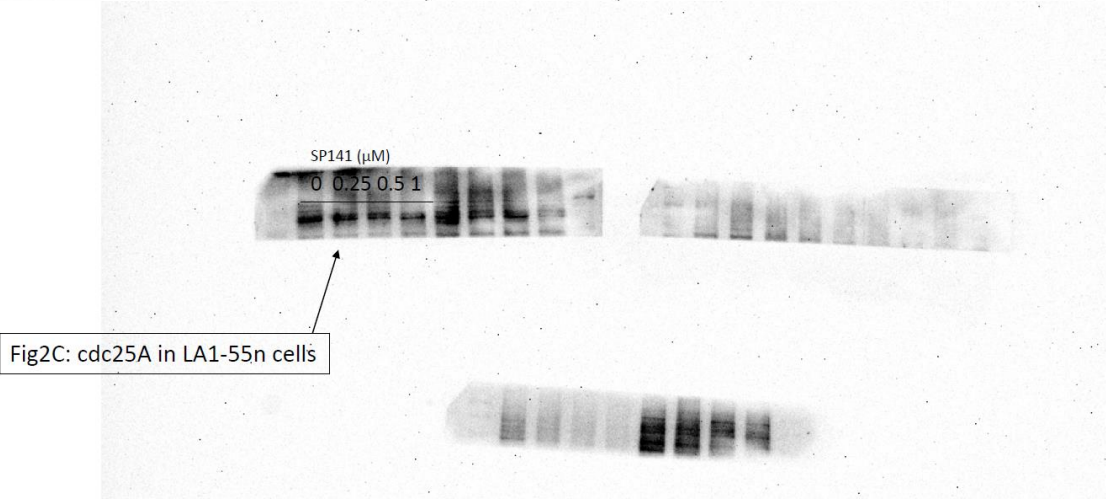

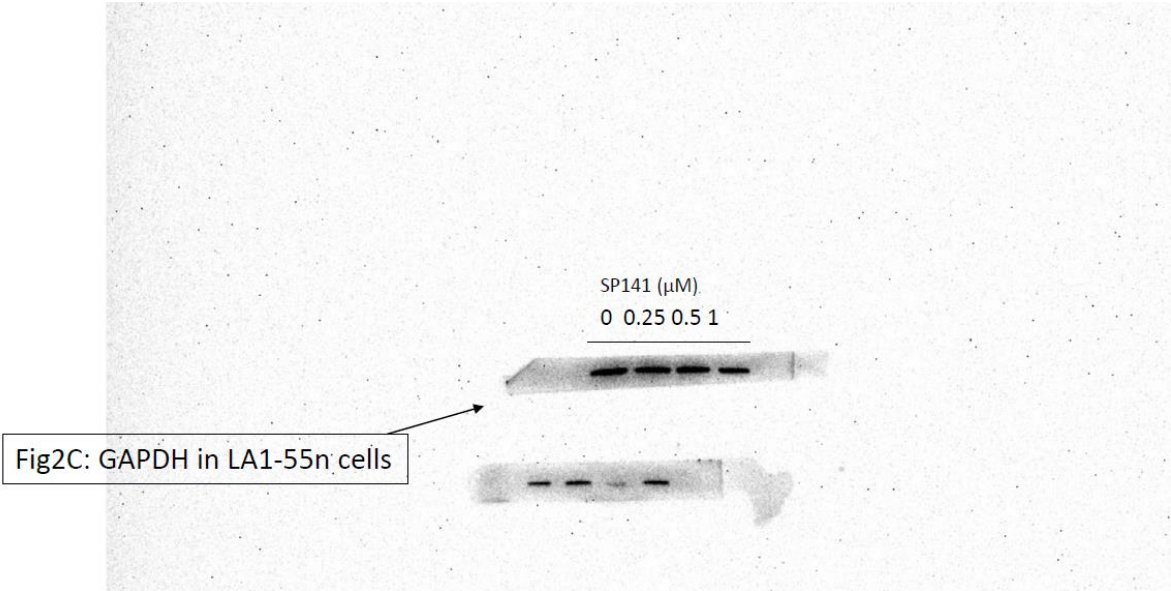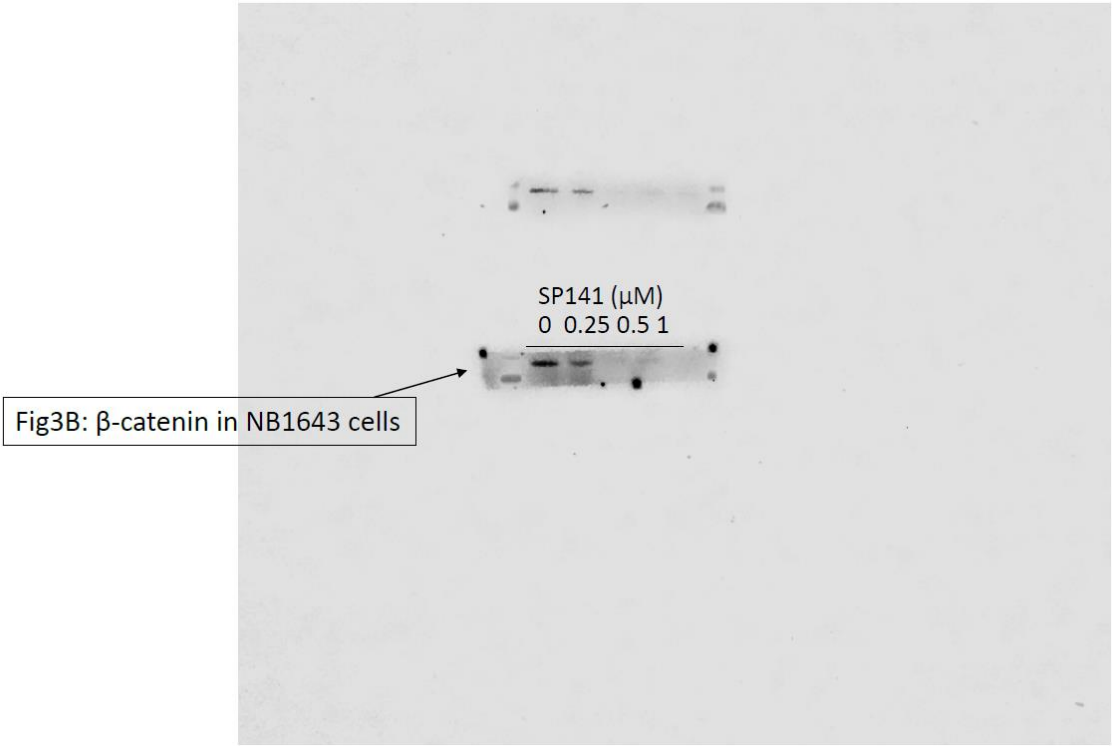

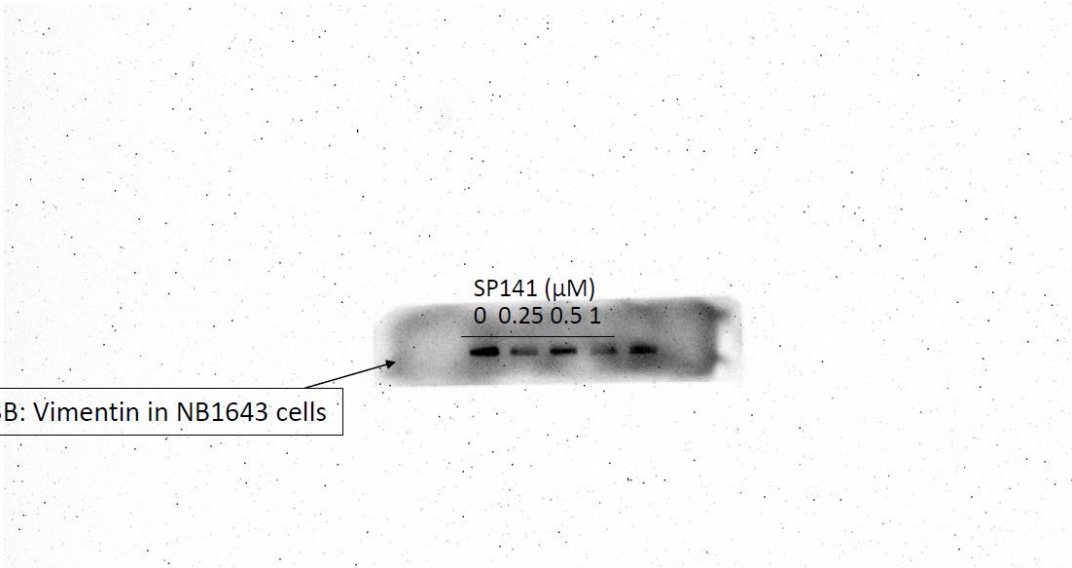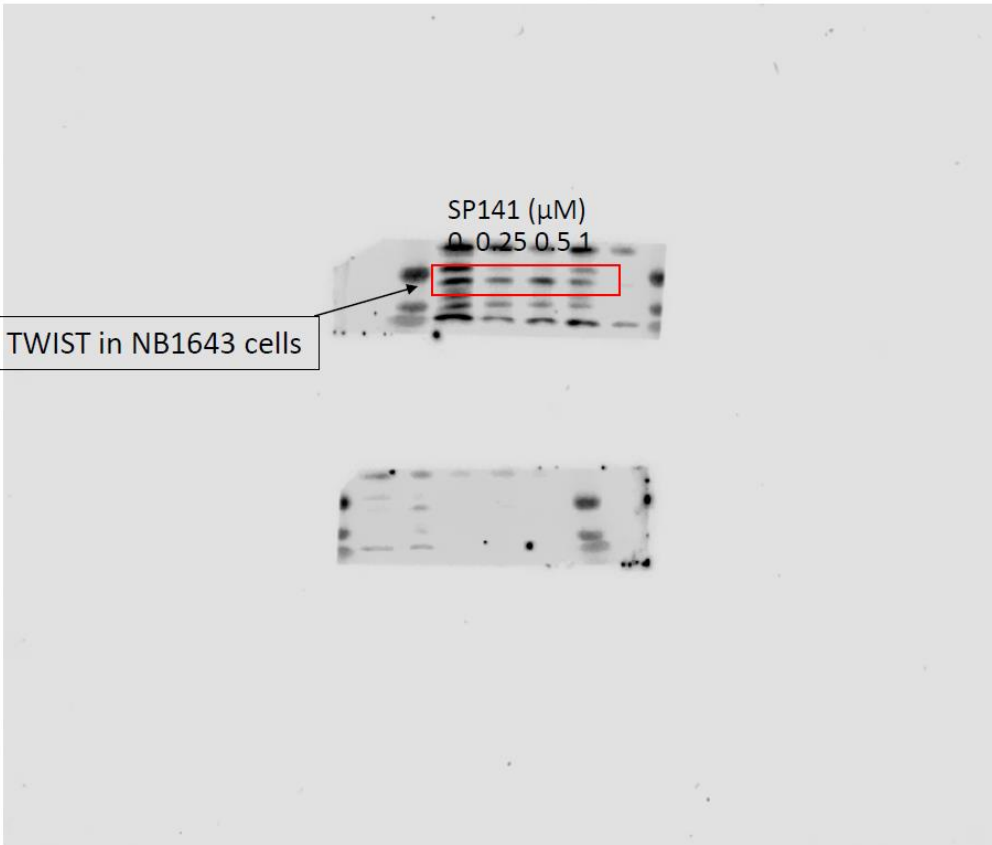



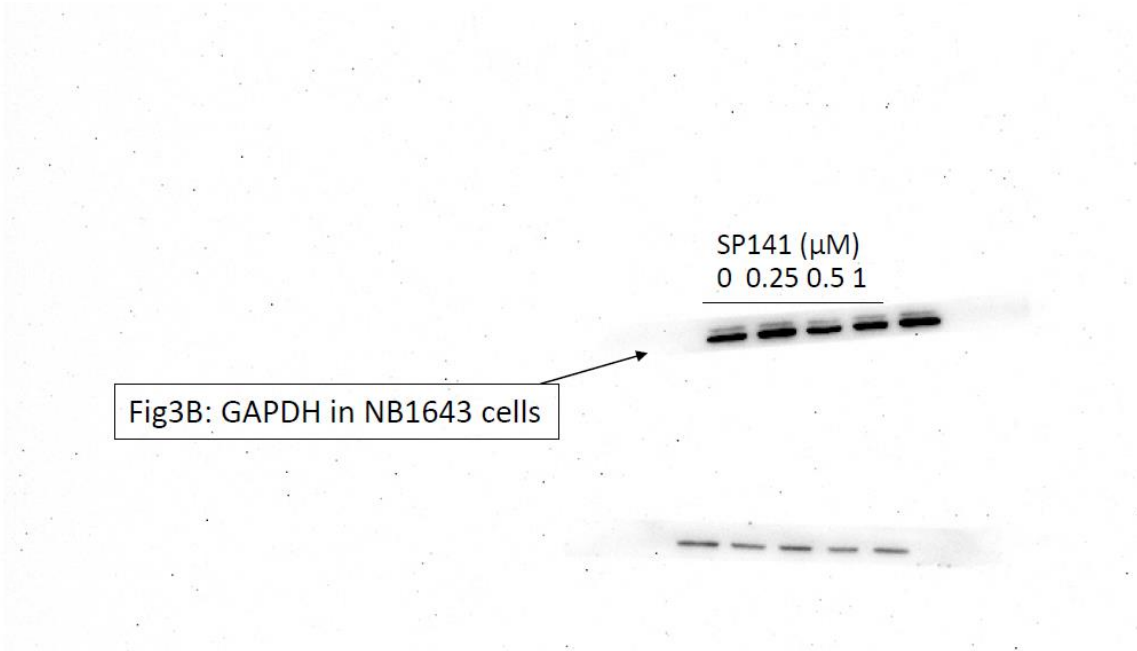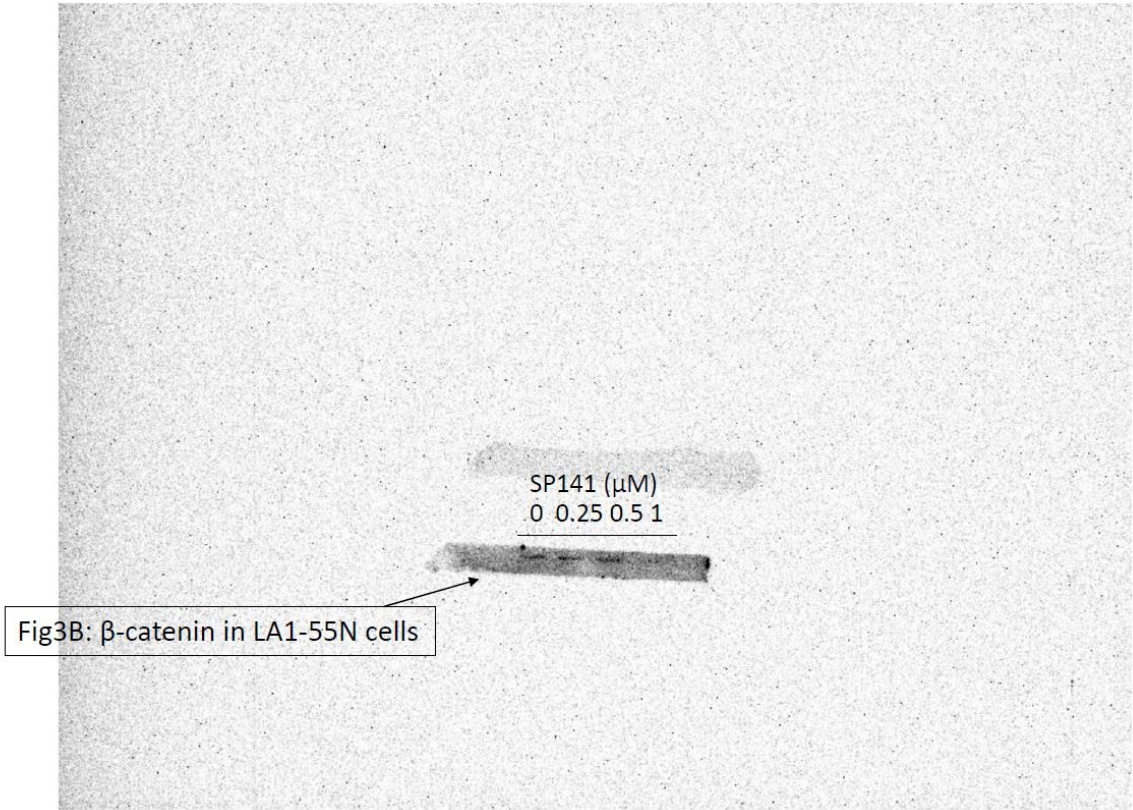

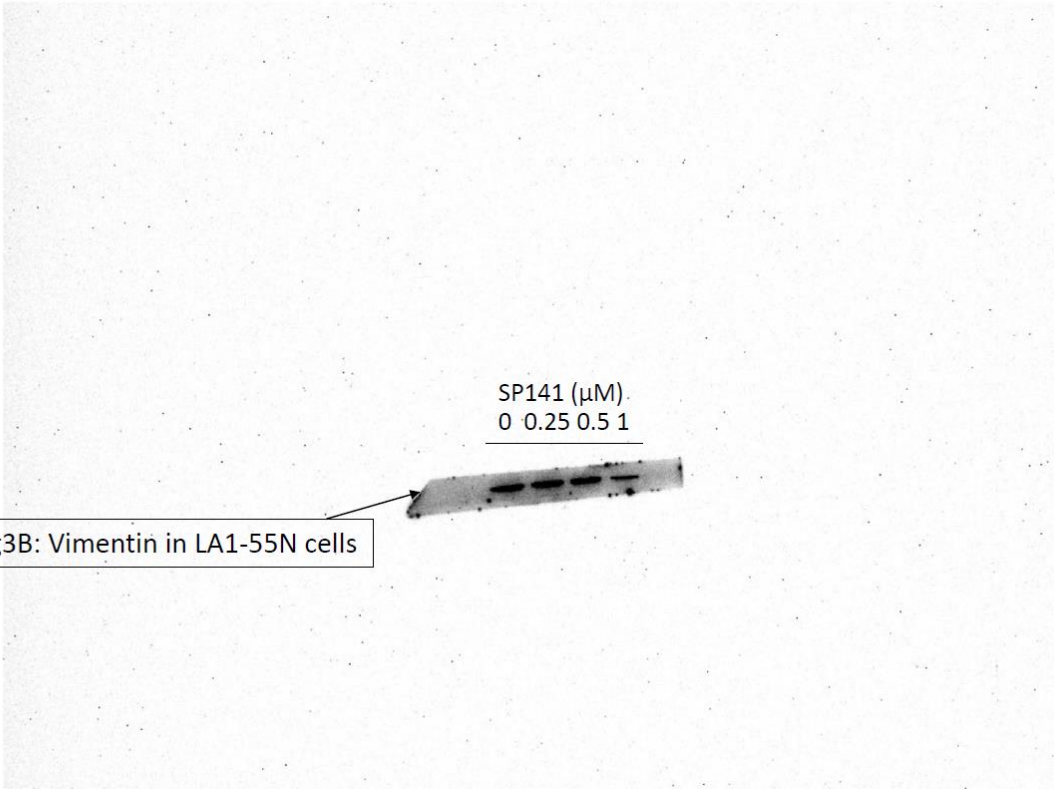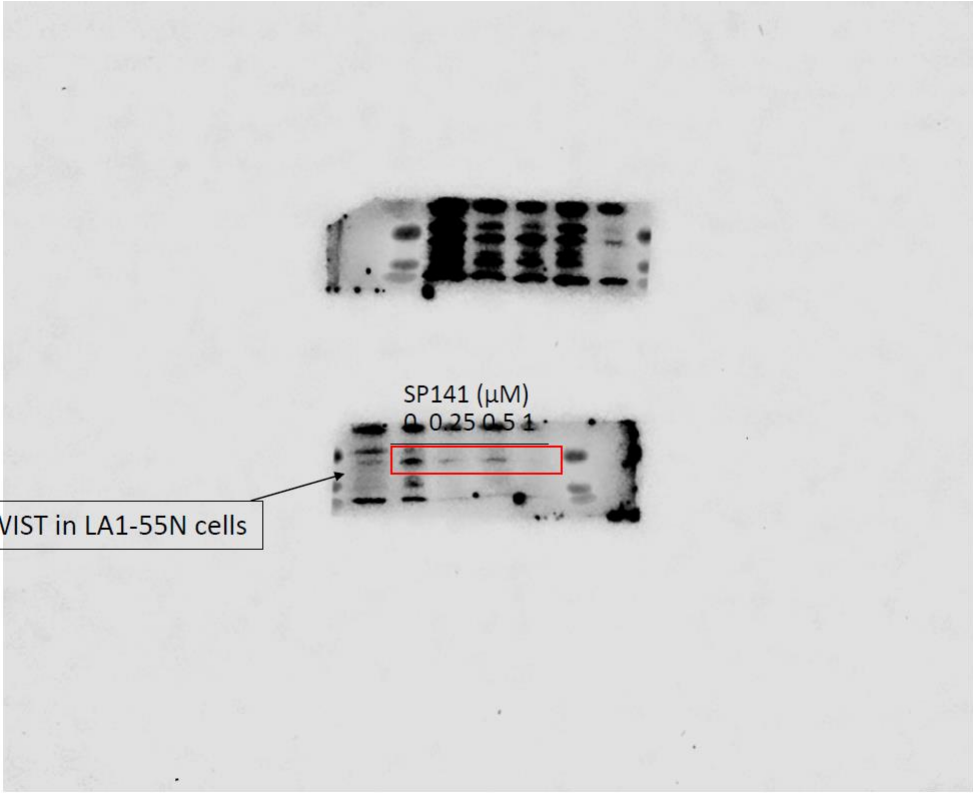

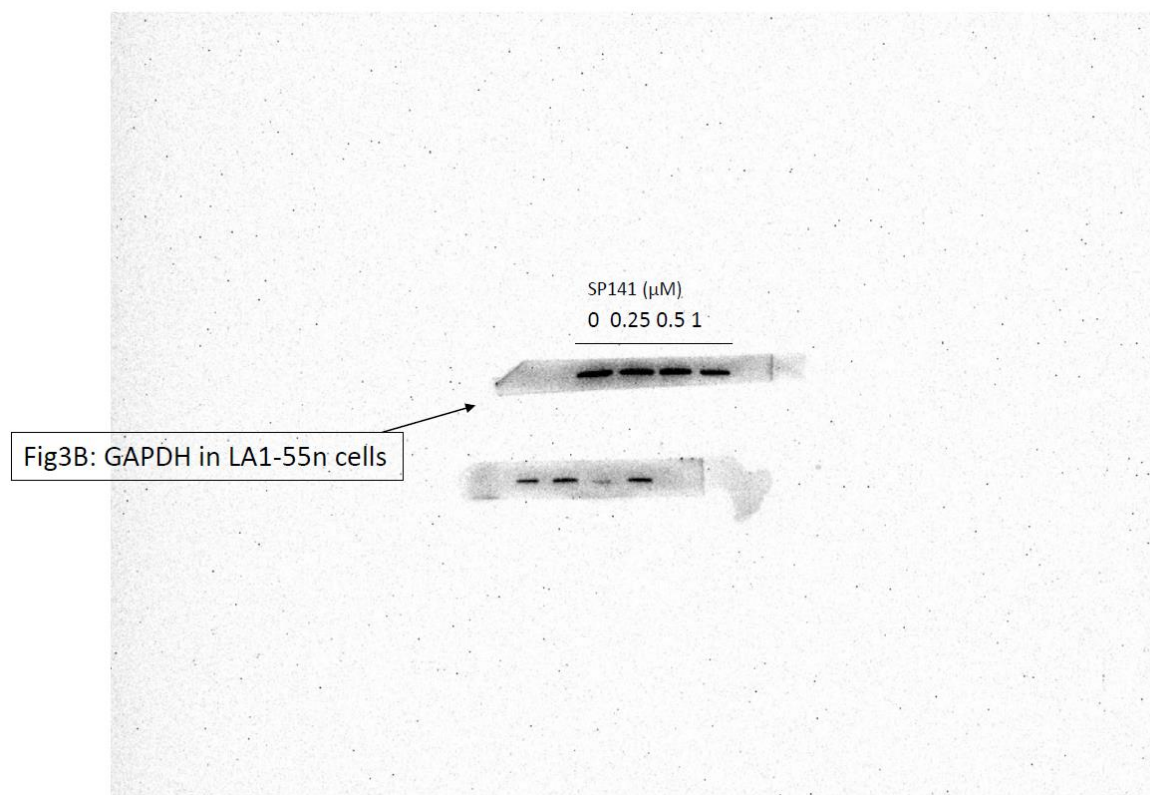

**Figure 1.** The full western blots.

**Publisher's Note:** MDPI stays neutral with regard to jurisdictional claims in published maps and institutional affiliations.

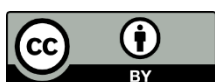

© 2020 by the authors. Licensee MDPI, Basel, Switzerland. This article is an open access article distributed under the terms and conditions of the Creative Commons Attribution (CC BY) license (<http://creativecommons.org/licenses/by/4.0/>).
